# Supplementary material for: Ductal tree ablation by local delivery of ethanol prevents tumor formation in an aggressive mouse model of breast cancer
Source: Springer Nature journal article supplement (doi:10.1186/s13058-019-1217-x), 2019-11-28
Supplement: MOESM1 [file 17445912]

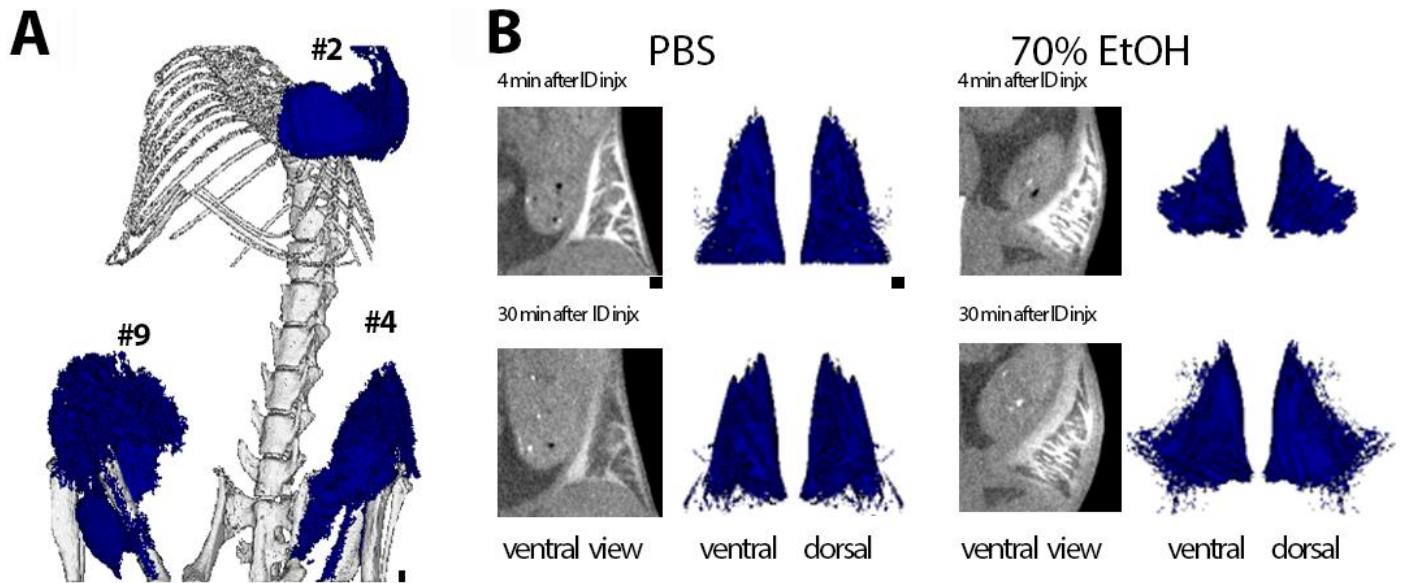

**Supplementary Figure 1. *In vivo* imaging of mammary glands with Isovue-300 in 70% ethanol-containing solution.** **A)** Iodine-based contrast agent-containing solution of 70% EtOH was sequentially injected within 15 min in left abdominal (#4), left thoracic (#2), and right abdominal gland (#9); full-body microCT scan was acquired immediately after the last ID injection. **B)** Sequential 4 min. high-resolution microCT scans were acquired from independent animals whose abdominal glands were injected with iodine-based contrast agent-containing solution of PBS or 70% EtOH. Different angle views and time points of the same representative glands are shown. Voxels with signal intensities from -500 to 500 Hounsfield units in original CT slices were selected for volume rendition of diffused contrast agent. Scale bars indicate 1 mm in image panels at different magnification.

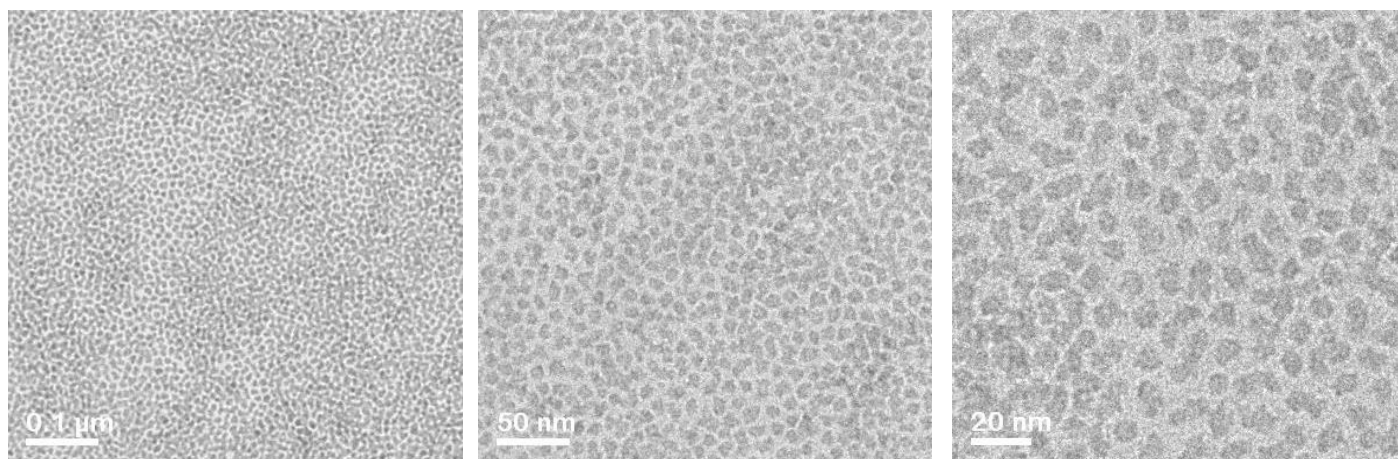

**Supplementary Figure 2. Characterization of Tantalum oxide (TaO<sub>x</sub>) nanocrystals (NCs) by transmission electron microscopy (TEM).** TEM images show excellent homogeneity in size and morphology of TaO<sub>x</sub> NCs. TEM images were acquired on a 2200FS JEOL electron microscope. These TaO<sub>x</sub> NCs were prepared as follows: In a 250 mL, one neck round bottom flask, fitted with a septa, IGEPAL®-CO-520 (average  $M_n$  441, ALDRICH, 23.0 g), Cyclohexane ( $\geq 99\%$ , A.C.S. spectrophotometric grade, SIGMA-ALDRICH, 200 mL) and Ethanol (200 Proof, Anhydrous, KOPTEC USP, 2.5 mL), were added and the contents were stirred to obtain a clear solution. To this stirring mixture, a solution of Sodium Hydroxide (100 mM, 2.5 mL) was added and the micro-emulsion was sonicated in a water bath to ensure homogeneity. Next, Tantalum (V) ethoxide, (Ta<sub>2</sub>O<sub>5</sub>, 99.98% trace metal basis, ALDRICH, 0.5 mL) was added in one portion and the contents were stirred at ambient temperature for 20 minutes. To the micro-emulsion mixture containing uncoated TaO<sub>x</sub> NCs, 2-[Methoxy (polyethyleneoxy)-9-12-propyl]trimethoxysilane (PEG-Silane, tech-90, MW 591-723, GELEST INC., 3.0 mL), quickly followed by (3-Aminopropyl)trimethoxysilane (APTMS, 97%, ALDRICH, 0.028 mL) were added. The resulting milky white suspension solution was stirred at room temperature for 16 h. After 16 h, the reaction mixture was diluted to three times volume using a 1:1 mixture of Ethyl Ether (Anhydrous, Certified ACS, Fisher Scientific, 110 mL) and Hexane (meets ACS specifications, VWR Chemicals, 110 mL) and the NCs were isolated via centrifugation (15,000 rpm, 10 minutes, 10 °C) as white oily residue. This residue was suspended in ethyl ether and washed using a similar centrifugation procedure twice. The supernatants were discarded and the residue pellet so obtained was suspended in 100 mL Ethanol and Methoxy-poly(ethylene-glycol)-succinimidyl glutarate (m-PEG-SG-2000, Average MW 2000, LAYSAN BIO INC., 50 mg) was added to it. The contents so obtained were stirred at room temperature in the dark for 12 h. Then, the solvent was removed on a rotary evaporator to reduce the volume to about 5 mL. This final residual solution was dissolved in water (10 mL) and transferred to Dialysis Membrane bags (SPECTRA/POR® 6 Dialysis Membrane, Standard RC Tubing, MWCO: 1 kD), clipped at both ends and dialyzed against water with regular change of external media after 2, 4, 16, 4, 4 and 16 h. After extensive dialysis, the contents in the dialysis bags were lyophilized to obtain the TaO<sub>x</sub> NCs as a white fluffy powder. Product Yield: 940 mg. Ta% = 30% (calculated from ICP-OES).

## Results

|                                | Size (d.nm):         | % Number | Width (d.nm...) |
|--------------------------------|----------------------|----------|-----------------|
| <b>Z-Average (d.nm):</b> 43.05 | <b>Peak 1:</b> 9.036 | 100.0    | 2.616           |
| <b>Pdl:</b> 0.458              | <b>Peak 2:</b> 0.000 | 0.0      | 0.000           |
| <b>Intercept:</b> 0.758        | <b>Peak 3:</b> 0.000 | 0.0      | 0.000           |

**Result quality :** Good

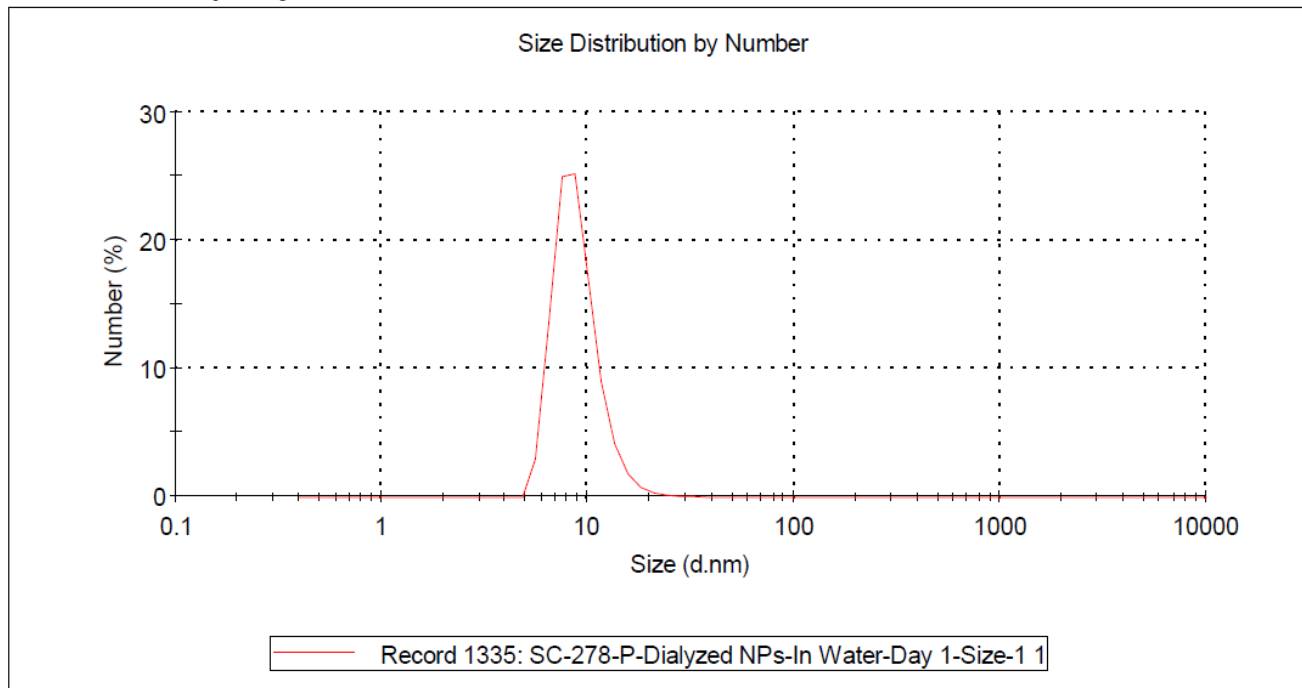

**Supplementary Figure 3. Characterization of TaO<sub>x</sub> nanocrystals by Dynamic Light Scattering (DLS).** DLS plot shows a narrow range of particle size distribution. TaO<sub>x</sub> were analyzed in hydrophilic conditions by dissolving TaO<sub>x</sub> nanocrystals at 1 mg/mL in water. DLS plot was acquired on a Zetasizer instrument (Malvern, USA).

| ID  | experimental group | Tumor in non-injected gland |   |   |   |   |   |   |   |   |    | Tumor in injected gland |   |   |   |   |   |   |   |   |    |
|-----|--------------------|-----------------------------|---|---|---|---|---|---|---|---|----|-------------------------|---|---|---|---|---|---|---|---|----|
|     |                    | 1                           | 2 | 3 | 4 | 5 | 6 | 7 | 8 | 9 | 10 | 1                       | 2 | 3 | 4 | 5 | 6 | 7 | 8 | 9 | 10 |
| 90  | untreated          | N                           | N | N | N | N | Y | N | N | N | N  |                         |   |   |   |   |   |   |   |   |    |
| 101 | untreated          | Y                           | Y | N | N | N | Y | N | Y | Y | Y  |                         |   |   |   |   |   |   |   |   |    |
| 106 | untreated          | Y                           | Y | N | N | N | N | N | Y | N | Y  |                         |   |   |   |   |   |   |   |   |    |
| 108 | untreated          | Y                           | Y | N | Y | Y | Y | N | N | N | N  |                         |   |   |   |   |   |   |   |   |    |
| 109 | untreated          | Y                           | N | Y | N | N | N | N | N | N | N  |                         |   |   |   |   |   |   |   |   |    |
| 112 | untreated          | Y                           | N | N | N | N | Y | N | Y | N | N  |                         |   |   |   |   |   |   |   |   |    |
| 115 | untreated          | N                           | Y | N | Y | N | N | N | N | N | Y  |                         |   |   |   |   |   |   |   |   |    |
| 121 | untreated          | N                           | Y | Y | N | N | Y | N | N | Y | N  |                         |   |   |   |   |   |   |   |   |    |
| 124 | untreated          | Y                           | Y | Y | N | N | Y | N | N | N | N  |                         |   |   |   |   |   |   |   |   |    |
| 137 | untreated          | Y                           | N | Y | N | N | N | Y | Y | Y | N  |                         |   |   |   |   |   |   |   |   |    |
| 155 | untreated          | Y                           | N | N | Y | N | Y | N | N | N | N  |                         |   |   |   |   |   |   |   |   |    |
| 156 | untreated          | Y                           | Y | N | N | N | Y | N | N | N | N  |                         |   |   |   |   |   |   |   |   |    |
| 158 | untreated          | N                           | Y | N | Y | Y | Y | N | N | Y | Y  |                         |   |   |   |   |   |   |   |   |    |
| 161 | untreated          | N                           | N | N | N | N | Y | N | N | N | N  |                         |   |   |   |   |   |   |   |   |    |
| 167 | untreated          | N                           | N | Y | Y | Y | Y | N | N | N | N  |                         |   |   |   |   |   |   |   |   |    |
| 170 | untreated          | N                           | N | N | Y | Y | N | N | N | N | Y  |                         |   |   |   |   |   |   |   |   |    |
| 175 | untreated          | Y                           | N | N | N | N | Y | Y | N | N | N  |                         |   |   |   |   |   |   |   |   |    |
| 192 | untreated          | Y                           | N | N | N | N | Y | N | Y | Y | N  |                         |   |   |   |   |   |   |   |   |    |
| 196 | untreated          | N                           | N | Y | N | N | N | N | N | Y | N  |                         |   |   |   |   |   |   |   |   |    |
| 202 | untreated          | Y                           | N | N | Y | N | Y | N | Y | Y | N  |                         |   |   |   |   |   |   |   |   |    |
| 203 | untreated          | Y                           | N | N | N | N | Y | N | N | N | Y  |                         |   |   |   |   |   |   |   |   |    |
| 208 | untreated          | N                           | N | N | N | N | N | Y | Y | N | N  |                         |   |   |   |   |   |   |   |   |    |
| 213 | untreated          | N                           | Y | Y | N | N | Y | N | N | N | Y  |                         |   |   |   |   |   |   |   |   |    |
| 218 | untreated          | Y                           | N | N | Y | N | Y | N | N | N | Y  |                         |   |   |   |   |   |   |   |   |    |
| 219 | untreated          | N                           | N | N | N | N | Y | N | N | N | N  |                         |   |   |   |   |   |   |   |   |    |

|     |                |   |   |   |   |   |   |   |   |   |   |  |  |  |  |  |  |  |  |  |  |
|-----|----------------|---|---|---|---|---|---|---|---|---|---|--|--|--|--|--|--|--|--|--|--|
| 311 | carprofen only | N | Y | N | N | Y | N | Y | N | N | Y |  |  |  |  |  |  |  |  |  |  |
| 312 | carprofen only | Y | N | N | N | N | N | Y | N | N | N |  |  |  |  |  |  |  |  |  |  |
| 314 | carprofen only | N | N | N | N | N | N | Y | Y | N | N |  |  |  |  |  |  |  |  |  |  |
| 315 | carprofen only | Y | N | N | N | N | Y | N | N | Y | Y |  |  |  |  |  |  |  |  |  |  |
| 318 | carprofen only | N | N | N | Y | N | Y | N | N | N | N |  |  |  |  |  |  |  |  |  |  |
| 319 | carprofen only | Y | N | N | N | N | Y | N | N | N | Y |  |  |  |  |  |  |  |  |  |  |
| 322 | carprofen only | Y | N | N | N | N | Y | N | N | N | Y |  |  |  |  |  |  |  |  |  |  |
| 323 | carprofen only | Y | Y | N | N | N | N | Y | N | Y | N |  |  |  |  |  |  |  |  |  |  |
| 325 | carprofen only | Y | N | N | N | N | Y | N | N | N | N |  |  |  |  |  |  |  |  |  |  |
| 327 | carprofen only | Y | N | N | N | N | N | Y | N | N | N |  |  |  |  |  |  |  |  |  |  |

|     |     |   |   |   |   |   |   |   |   |   |   |   |   |   |   |   |   |   |   |   |   |
|-----|-----|---|---|---|---|---|---|---|---|---|---|---|---|---|---|---|---|---|---|---|---|
| 207 | PBS | Y |   |   |   |   | Y |   |   | Y |   |   | Y | N | Y | N |   | Y | N |   | N |
| 209 | PBS |   |   |   |   | N | N |   |   |   | N | Y | Y | N | N |   |   | N | N | N |   |
| 215 | PBS |   | Y |   | Y | N |   |   |   |   | N | Y |   |   | N |   | Y | Y | N | N |   |
| 216 | PBS | Y |   |   |   |   | Y |   |   |   | N |   | Y | N | Y | N |   | Y | Y | N |   |
| 220 | PBS |   |   | Y |   | Y | N | N |   |   | N | Y | Y |   | Y |   |   |   | N | N |   |
| 222 | PBS |   |   | Y |   |   | N |   | N |   | N | Y | N |   | N | N |   | N |   | N |   |
| 231 | PBS | Y |   | N |   |   | N | Y |   | Y |   |   | Y |   | Y | N |   |   | Y |   | Y |
| 241 | PBS | Y |   | Y |   |   | Y | Y |   | Y |   |   | Y |   | Y | Y |   |   | N |   | Y |

|     |     |   |  |   |   |   |   |  |  |   |   |  |   |  |   |  |   |   |  |
|-----|-----|---|--|---|---|---|---|--|--|---|---|--|---|--|---|--|---|---|--|
| 242 | PBS | Y |  | Y | Y |   | Y |  |  | Y |   |  | Y |  | Y |  | Y | N |  |
| 243 | PBS | Y |  | N |   | N | Y |  |  | N | N |  | Y |  | N |  | N | Y |  |

|     |                        |   |   |   |   |   |   |   |   |   |   |  |   |   |   |   |   |   |   |
|-----|------------------------|---|---|---|---|---|---|---|---|---|---|--|---|---|---|---|---|---|---|
| 280 | 50% EtOH[Contrast/PBS] | N | Y | Y |   |   | N |   |   |   |   |  | N | N |   | Y | N | N |   |
| 285 | 50% EtOH[Contrast/PBS] | Y | N | Y | N | Y | N | Y | N |   |   |  |   |   |   |   |   | N | N |
| 286 | 50% EtOH[Contrast/PBS] | Y | N | N |   |   | Y |   |   | N | N |  |   | N | N |   | N | N |   |
| 287 | 50% EtOH[Contrast/PBS] | Y | N | N |   |   | N | N |   |   |   |  | N |   |   | N | N | Y |   |
| 288 | 50% EtOH[Contrast/PBS] | Y | N |   |   | Y | Y |   |   |   |   |  | N | N |   | Y | N | Y | N |
| 290 | 50% EtOH[Contrast/PBS] | N | N |   | N | Y | N | N |   |   |   |  | N |   |   |   | N | N |   |

|     |                        |   |   |   |   |   |   |   |   |   |   |   |   |   |   |   |   |   |   |
|-----|------------------------|---|---|---|---|---|---|---|---|---|---|---|---|---|---|---|---|---|---|
| 297 | 70% EtOH[Contrast/PBS] | Y | Y |   | Y |   | N |   |   |   |   | N |   | N |   | Y | Y | N |   |
| 304 | 70% EtOH[Contrast/PBS] | N | N | N |   | N | N |   | Y |   |   | N |   |   |   | N |   | N |   |
| 305 | 70% EtOH[Contrast/PBS] | Y |   |   |   | Y | N |   | Y |   |   | N | N | N |   |   | N | N |   |
| 308 | 70% EtOH[Contrast/PBS] | Y | N | N |   | N | Y |   |   | N | N |   |   |   | N |   | N | N |   |
| 309 | 70% EtOH[Contrast/PBS] | N | Y |   |   |   | N |   | Y | N |   |   |   | N | N | N |   | N |   |
| 316 | 70% EtOH[Contrast/PBS] |   | Y |   |   | N | Y | N |   |   |   | N | N |   |   |   |   | N | N |
| 317 | 70% EtOH[Contrast/PBS] | Y |   |   | N | Y | Y |   | Y |   |   | Y |   | N | N |   |   | N | N |
| 324 | 70% EtOH[Contrast/PBS] | Y |   |   | Y | N | Y |   |   |   |   | N |   | N | Y |   |   | N | N |
| 338 | 70% EtOH[Contrast/PBS] |   |   | Y |   |   | Y |   |   |   |   | N | Y | N | N | N |   | N | N |
| 341 | 70% EtOH[Contrast/PBS] | Y |   |   |   |   | N |   | Y |   |   | N |   | N | N | N |   | N |   |
| 342 | 70% EtOH[Contrast/PBS] | Y |   | Y |   | N | Y |   | Y |   |   | Y |   | N |   |   |   | N | N |

|     |               |   |   |   |   |   |   |   |   |   |   |  |   |   |   |   |   |   |   |
|-----|---------------|---|---|---|---|---|---|---|---|---|---|--|---|---|---|---|---|---|---|
| 188 | 70% EtOH[H2O] | Y | N | N |   |   |   |   |   | N | N |  |   |   | N | N | N | N | N |
| 190 | 70% EtOH[H2O] | Y |   |   |   |   | N | N | N |   |   |  | N | N | N | N |   |   | N |
| 193 | 70% EtOH[H2O] |   |   |   |   | N | Y | Y | N |   |   |  | N | N | N | N |   |   | N |
| 200 | 70% EtOH[H2O] | N | Y | N |   |   | N | N | N |   |   |  |   |   | N | N |   |   | N |
| 291 | 70% EtOH[H2O] |   | Y |   |   |   |   |   |   |   |   |  | N |   | N | N | Y | N | N |
| 292 | 70% EtOH[H2O] | Y |   |   |   |   | Y | N | Y |   |   |  | N | N | N | N | N |   |   |
| 294 | 70% EtOH[H2O] |   |   | Y |   |   |   |   |   |   |   |  | N | N |   | N | N | N | N |
| 296 | 70% EtOH[H2O] |   |   |   |   |   | Y |   |   |   |   |  | N | N | N | N | N |   | N |
| 299 | 70% EtOH[H2O] |   | Y |   |   |   |   |   |   |   |   |  | N |   | N | N | N | Y | N |
| 300 | 70% EtOH[H2O] | Y |   |   | Y |   | Y |   |   |   |   |  |   | N | N |   | Y |   | N |
| 301 | 70% EtOH[H2O] |   | Y |   |   |   |   |   | Y |   |   |  | N |   | N | N | N | Y | Y |
| 307 | 70% EtOH[H2O] |   |   |   | Y |   |   |   |   |   |   |  | Y | N | N |   | N | N | N |
| 310 | 70% EtOH[H2O] |   |   |   |   | Y |   | Y |   |   |   |  | N | N | N | N |   | Y |   |

**Supplementary Table 1. Tumor formation in non-injected and injected mammary glands assessed at necropsy.** Presence of a tumor at necropsy is indicated with a “Y” for yes and absence with a “N” for no. Fields are left blank for mammary glands that were not part of that experimental group or class. Mammary gland location code: 1 = left cervical; 2 = left upper thoracic; 3 = left lower thoracic; 4 = left abdominal; 5 = left inguinal; 6 = right cervical; 7 = right upper thoracic; 8 = right lower thoracic; 9 = right abdominal; 10 = right inguinal.
